# Supplementary material for: Blood Pressure, Readmission, and Mortality Among Patients Hospitalized With Acute Kidney Injury
Source: PubMed Central journal article supplement (PMC11091759; doi:10.1001/jamanetworkopen.2024.10824), 2024-05-13
Supplement: jamanetwopen-e2410824-s001.pdf [file jamanetwopen-e2410824-s001.pdf]

## Supplemental Online Content

Griffin BR, Vaughan-Sarrazin M, Shi Q, et al. Blood pressure, readmission, and mortality among patients hospitalized with acute kidney injury. *JAMA Netw Open*. 2024;7(5):e2410824. doi:10.1001/jamanetworkopen.2024.10824

**eTable 1.** Patient Characteristics Based on First Blood Pressure After Discharge

**eFigure 1.** Unadjusted Absolute Mortality Rates Over Time From Hospital Discharge for All Blood Pressure Categories

**eFigure 2.** Unadjusted Absolute Readmission Rates Over Time From Hospital Discharge for All Blood Pressure Categories

**eTable 2.** ACEI/ARB Stratification: Hazard Ratios and 99% Confidence Intervals for Mortality and Readmission Over Time, by Blood Pressure Category

**eFigure 3.** Predicted Monthly Mortality Rates Over Time From Hospital Discharge for an “Average” Patient, With All Variables in the Model Except the Blood Pressure Category Set to Mean Values, for All Blood Pressure Categories in Those Who Did and Did Not Have an ACEI/ARB Prescribed Within 90 Days

**eTable 3.** In Patients Without CHF at Baseline, Adjusted Hazard Ratios and 99% Confidence Intervals for Mortality and All-Cause Hospital Readmission Over Time, by Blood Pressure Category

**eTable 4.** AKI Stage Stratification: Hazard Ratios and 95% Confidence Intervals for Mortality and Readmission Over Time, by Blood Pressure Category

This supplemental material has been provided by the authors to give readers additional information about their work.

**eTable 1.** Patient Characteristics Based on First Blood Pressure After Discharge

| Characteristics*                           | <120<br>n=24,074 | 120-129<br>N=20,063 | 130-139<br>N=18,678 | 140-149<br>N=9,995 | 150-159<br>N=4,887 | ≥160<br>N=3,263 | p-value |
|--------------------------------------------|------------------|---------------------|---------------------|--------------------|--------------------|-----------------|---------|
| Age (years)                                |                  |                     |                     |                    |                    |                 | <.001   |
| <45                                        | 546 (2.3)        | 472 (2.4)           | 410 (2.2)           | 143 (1.4)          | 65 (1.3)           | 26 (0.8)        |         |
| 45-59                                      | 3,050 (12.7)     | 2,844 (14.2)        | 2,560 (13.7)        | 1,394 (13.9)       | 634 (13.0)         | 428 (13.1)      |         |
| 60-64                                      | 3,247 (13.5)     | 2,814 (14.0)        | 2,546 (13.6)        | 1,394 (13.9)       | 697 (14.3)         | 448 (13.7)      |         |
| 65-69                                      | 5,618 (23.3)     | 4,562 (22.7)        | 4,415 (23.6)        | 2,325 (23.3)       | 1,174 (24.0)       | 779 (23.9)      |         |
| 70-74                                      | 4,385 (18.2)     | 3,504 (17.5)        | 3,351 (17.9)        | 1,818 (18.2)       | 895 (18.3)         | 570 (17.5)      |         |
| 75-84                                      | 4,597 (19.1)     | 3,800 (18.9)        | 3,531 (18.9)        | 1,829 (18.3)       | 925 (18.9)         | 641 (19.6)      |         |
| >84                                        | 2,631 (10.9)     | 2,067 (10.3)        | 1,865 (10.0)        | 1,092 (10.9)       | 497 (10.2)         | 371 (11.4)      |         |
| Black Race                                 | 4,490 (18.9)     | 4,595 (19.1)        | 4,418 (22.0)        | 4,398 (23.5)       | 2,619 (26.2)       | 1,377 (28.2)    | <.001   |
| ACEI/ARB use within 60 days of discharge   | 10,041 (41.7)    | 8,366 (41.7)        | 8,090 (43.3)        | 4,713 (47.2)       | 2,370 (48.5)       | 1,719 (52.7)    | <.001   |
| Unexplained Weight Loss                    | 1,941 (8.1)      | 1,274 (6.3)         | 1,061 (5.7)         | 552 (5.5)          | 254 (5.2)          | 174 (5.3)       | <.001   |
| Dementia                                   | 1,285 (5.3)      | 1,026 (5.1)         | 918 (4.9)           | 483 (4.8)          | 249 (5.1)          | 154 (4.7)       | 0.3     |
| Congestive Heart Failure                   | 8,383 (34.8)     | 5,314 (26.5)        | 4,412 (23.6)        | 2,491 (24.9)       | 1,208 (24.7)       | 808 (24.8)      | <.001   |
| Chronic Lung Disease                       | 9,184 (38.1)     | 6,893 (34.4)        | 6,082 (32.6)        | 3,094 (31.0)       | 1,509 (30.9)       | 920 (28.2)      | <.001   |
| Baseline serum creatinine, mean (SD)       | 1.3 ± 0.6        | 1.3 ± 0.7           | 1.3 ± 0.8           | 1.4 ± 0.9          | 1.5 ± 1.0          | 1.7 ± 1.1       | <.001   |
| Discharge serum creatinine, mean (SD)      | 1.4 ± 1.2        | 1.5 ± 1.3           | 1.6 ± 1.4           | 1.7 ± 1.6          | 1.8 ± 1.6          | 2.0 ± 1.8       | <.001   |
| Renal Replacement Therapy During Admission | 231 (1.0)        | 211 (1.1)           | 208 (1.1)           | 152 (1.5)          | 79 (1.6)           | 57 (1.8)        | <.001   |
| Tobacco Use                                | 5439 (22.5)      | 4345 (21.7)         | 3858 (20.7)         | 2060 (20.6)        | 984 (20.1)         | 625 (19.2)      | <.001   |
| Albumin (g/g)                              |                  |                     |                     |                    |                    |                 | <.001   |
| ≤ 1.9                                      | 590 (2.5)        | 405 (2.0)           | 348 (1.9)           | 211 (2.1)          | 91 (1.9)           | 84 (2.6)        |         |
| 2.0 -2.4                                   | 1,767 (7.3)      | 1,290 (6.4)         | 1,148 (6.1)         | 624 (6.2)          | 341 (7.0)          | 239 (7.3)       |         |
| 2.5 – 4.4                                  | 20,676 (85.9)    | 17,314 (86.3)       | 16,227 (86.9)       | 8,699 (87.0)       | 4,234 (86.6)       | 2,812 (86.2)    |         |
| ≥ 4.5                                      | 1,041 (4.3)      | 1,054 (5.3)         | 955 (5.1)           | 461 (4.6)          | 221 (4.5)          | 128 (3.9)       |         |
| Bilirubin (mg/dL)                          |                  |                     |                     |                    |                    |                 | <.001   |
| ≤ 1.9                                      | 22,312 (92.7)    | 18,875 (94.1)       | 17,729 (94.9)       | 9,560 (95.6)       | 4,713 (96.4)       | 3,162 (96.9)    |         |
| 2.0 - 2.9                                  | 959 (4.0)        | 699 (3.5)           | 542 (2.9)           | 233 (2.3)          | 107 (2.2)          | 63 (1.9)        |         |
| 3.0 – 4.9                                  | 464 (1.9)        | 306 (1.5)           | 249 (1.3)           | 111 (1.1)          | 41 (0.8)           | 26 (0.8)        |         |
| 5.0 – 7.9                                  | 202 (0.8)        | 89 (0.4)            | 101 (0.5)           | 53 (0.5)           | 17 (0.3)           | 7 (0.2)         |         |
| ≥ 8.0                                      | 137 (0.6)        | 94 (0.5)            | 57 (0.3)            | 38 (0.4)           | 9 (0.2)            | 5 (0.2)         |         |
| Blood Urea Nitrogen (mg/dL)                |                  |                     |                     |                    |                    |                 | <.001   |
| < 16.9                                     | 3,699 (15.4)     | 3,262 (16.3)        | 2,826 (15.1)        | 1,375 (13.8)       | 566 (11.6)         | 343 (10.5)      |         |
| 17-19                                      | 1,939 (8.1)      | 1,699 (8.5)         | 1,558 (8.3)         | 780 (7.8)          | 369 (7.6)          | 213 (6.5)       |         |
| 20-39                                      | 11,248 (46.7)    | 9,411 (46.9)        | 8,711 (46.6)        | 4,527 (45.3)       | 2,247 (46.0)       | 1,476 (45.2)    |         |
| 40-79                                      | 5,697 (23.7)     | 4,563 (22.7)        | 4,492 (24.0)        | 2,639 (26.4)       | 1,348 (27.6)       | 974 (29.8)      |         |
| ≥ 80                                       | 1,491 (6.2)      | 1,128 (5.6)         | 1,091 (5.8)         | 674 (6.7)          | 357 (7.3)          | 257 (7.9)       |         |
| Hematocrit                                 |                  |                     |                     |                    |                    |                 | <.001   |
| 41-49%                                     | 21,751 (90.4)    | 18,374 (91.6)       | 16,982 (90.9)       | 9,138 (91.4)       | 4,465 (91.4)       | 3,026 (92.7)    |         |
| <40.9% OR ≥50%                             | 2,323 (9.6)      | 1,689 (8.4)         | 1,696 (9.1)         | 857 (8.6)          | 422 (8.6)          | 237 (7.3)       |         |
| AKI Stage                                  |                  |                     |                     |                    |                    |                 | <.001   |
| 1                                          | 19,301 (80.2)    | 15,843 (79.0)       | 14,672 (78.6)       | 7,659 (76.6)       | 3,700 (75.7)       | 2,413 (74.0)    |         |
| 2                                          | 2,448 (10.2)     | 2,053 (10.2)        | 1,836 (9.8)         | 941 (9.4)          | 432 (8.8)          | 245 (7.5)       |         |
| 3                                          | 2,325 (9.7)      | 2,167 (10.8)        | 2,170 (11.6)        | 1,395 (14.0)       | 755 (15.4)         | 605 (18.5)      |         |
| Proteinuria during hospital episode        |                  |                     |                     |                    |                    |                 | <.001   |
| normal                                     | 8187 (34.0)      | 6332 (31.6)         | 5255 (28.1)         | 2528 (25.3)        | 1118 (22.9)        | 677 (20.8)      |         |
| mild                                       | 11168 (46.4)     | 9597 (47.8)         | 8990 (48.1)         | 4848 (48.5)        | 2285 (46.8)        | 1560 (47.8)     |         |
| heavy                                      | 2492 (10.4)      | 2545 (12.7)         | 2894 (15.5)         | 1847 (18.5)        | 1123 (23.0)        | 758 (23.2)      |         |
| missing                                    | 2227 (9.3)       | 1589 (7.9)          | 1539 (8.2)          | 772 (7.7)          | 361 (7.4)          | 268 (8.2)       |         |

**eFigure 1.** Unadjusted Absolute Mortality Rates Over Time From Hospital Discharge for All Blood Pressure Categories

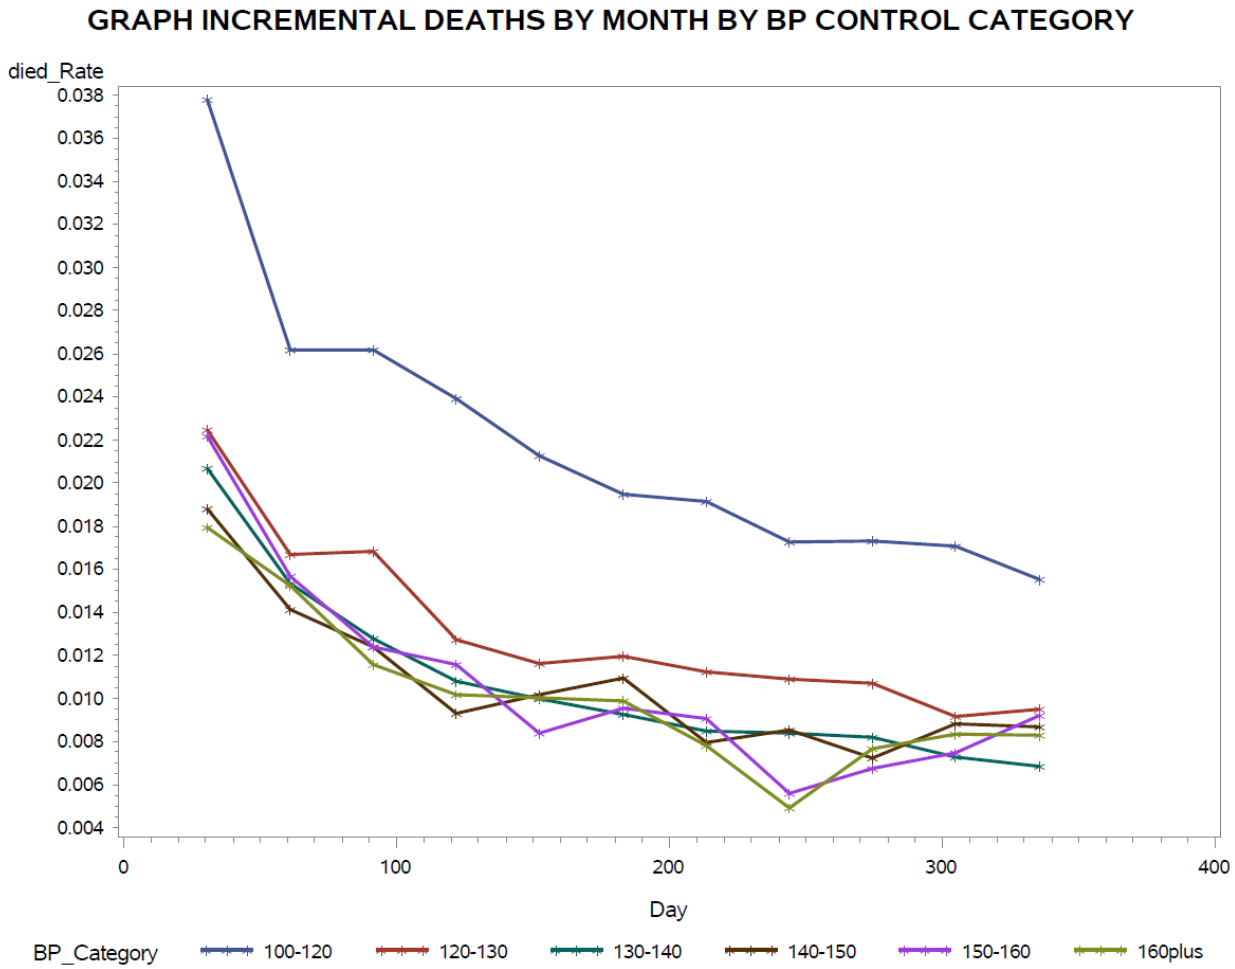

**eFigure 2.** Unadjusted Absolute Readmission Rates Over Time From Hospital Discharge for All Blood Pressure Categories

**GRAPH INCREMENTAL READMISSION BY MONTH BY BP CONTROL CATEGORY**

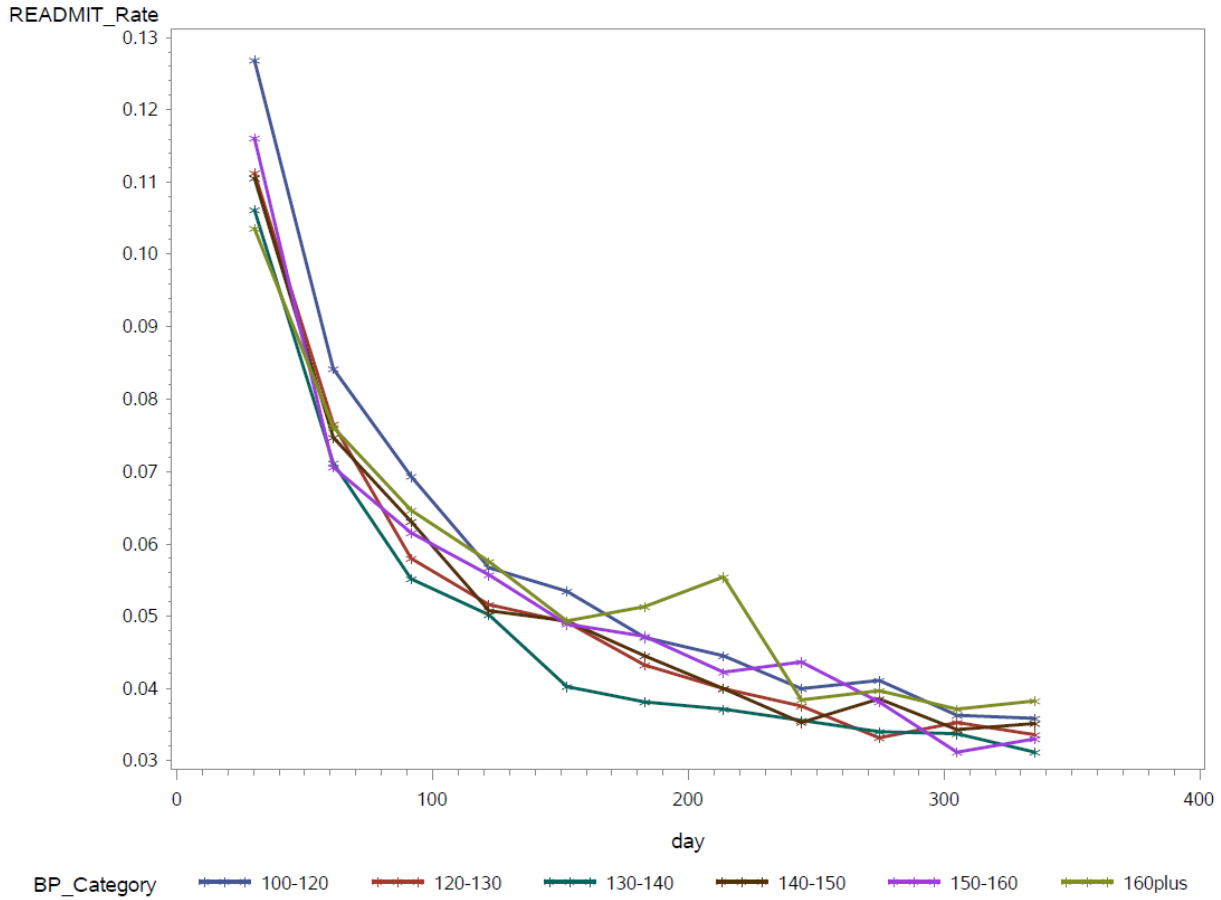

**eTable 2.** ACEI/ARB Stratification: Hazard Ratios and 99% Confidence Intervals for Mortality and Readmission Over Time, by Blood Pressure Category

**A. No ACEI/ARB Within 60 Days**

|                                     |                    | Systolic Blood Pressure (mm Hg) |                               |                             |                               |                               |                              |           |
|-------------------------------------|--------------------|---------------------------------|-------------------------------|-----------------------------|-------------------------------|-------------------------------|------------------------------|-----------|
|                                     |                    | <120                            | 120-129                       | 130-139                     | 140-149                       | 150-159                       | ≥160                         |           |
| <b>Days From Hospital Discharge</b> | <b>Mortality</b>   | <b>60</b>                       | 1.97 (1.45-2.66)<br>p < 0.001 | 1.20 (0.88-1.64)<br>p = 0.1 | 1.08 (0.78-1.48)<br>p = 0.5   | 0.95 (0.67-1.36)<br>p = 0.7   | 1.13 (0.76-1.69)<br>p = 0.4  | Reference |
|                                     |                    | <b>90</b>                       | 1.91 (1.42-2.58)<br>p < 0.001 | 1.17 (0.86-1.58)<br>p = 0.2 | 1.01 (0.74-1.38)<br>p = 0.9   | 0.92 (0.65-1.30)<br>p = 0.5   | 1.07 (0.73-1.58)<br>p = 0.6  |           |
|                                     |                    | <b>120</b>                      | 1.86 (1.39-2.50)<br>p < 0.001 | 1.13 (0.83-1.53)<br>p = 0.3 | 0.94 (0.69-1.29)<br>p = 0.6   | 0.89 (0.63-1.25)<br>p = 0.4   | 1.02 (0.69-1.49)<br>p = 0.9  |           |
|                                     |                    | <b>180</b>                      | 1.77 (1.31-2.38)<br>p < 0.001 | 1.06 (0.78-1.45)<br>p = 0.6 | 0.83 (0.60-1.14)<br>p = 0.1   | 0.83 (0.58-1.18)<br>p = 0.2   | 0.91 (0.60-1.39)<br>p = 0.6  |           |
|                                     |                    | <b>270</b>                      | 1.63 (1.19-2.24)<br>p < 0.001 | 0.97 (0.69-1.37)<br>p = 0.8 | 0.68 (0.47-0.98)<br>p = 0.006 | 0.74 (0.49-1.14)<br>p = 0.07  | 0.78 (0.45-1.34)<br>p = 0.2  |           |
|                                     |                    | <b>365</b>                      | 1.51 (1.05-2.15)<br>p = 0.003 | 0.89 (0.59-1.33)<br>p = 0.4 | 0.56 (0.36-0.86)<br>p < 0.001 | 0.67 (0.39-1.14)<br>p = 0.051 | 0.66 (0.32-1.36)<br>p = 0.1  |           |
|                                     | <b>Readmission</b> | <b>60</b>                       | 1.18 (1.00-1.39)<br>p = 0.011 | 1.20 (0.88-1.64)<br>p = 0.1 | 1.21 (0.96-1.52)<br>p = 0.03  | 1.16 (0.90-1.49)<br>p = 0.1   | 1.27 (0.95-1.70)<br>p=0.03   | Reference |
|                                     |                    | <b>90</b>                       | 1.12 (0.95-1.32)<br>p = 0.07  | 1.17 (0.86-1.58)<br>p = 0.2 | 1.12 (0.90-1.40)<br>p = 0.2   | 1.14 (0.89-1.45)<br>p = 0.2   | 1.20 (0.91-1.58)<br>p = 0.09 |           |
|                                     |                    | <b>120</b>                      | 1.07 (0.91-1.26)<br>p = 0.3   | 1.13 (0.83-1.53)<br>p = 0.3 | 1.04 (0.84-1.29)<br>p = 0.6   | 1.12 (0.88-1.42)<br>p = 0.2   | 1.13 (0.86-1.48)<br>p = 0.3  |           |
|                                     |                    | <b>180</b>                      | 0.97 (0.82-1.14)<br>p = 0.6   | 1.06 (0.78-1.45)<br>p = 0.6 | 0.89 (0.71-1.12)<br>p = 0.2   | 1.08 (0.84-1.38)<br>p = 0.4   | 1.00 (0.75-1.34)<br>p > 0.99 |           |
|                                     |                    | <b>270</b>                      | 0.83 (0.69-1.01)<br>p = 0.014 | 0.97 (0.69-1.37)<br>p = 0.8 | 0.71 (0.54-0.93)<br>p = 0.001 | 1.02 (0.75-1.39)<br>p = 0.9   | 0.84 (0.57-1.23)<br>p = 0.2  |           |
|                                     |                    | <b>365</b>                      | 0.72 (0.57-0.90)<br>p < 0.001 | 0.89 (0.59-1.33)<br>p = 0.4 | 0.57 (0.41-0.79)<br>p < 0.001 | 0.97 (0.65-1.43)<br>p = 0.8   | 0.70 (0.42-1.16)<br>p = 0.07 |           |

**B. ACEI/ARB Within 60 Days**

|                                     |                    | Systolic Blood Pressure (mm Hg) |                               |                               |                               |                               |                               |           |
|-------------------------------------|--------------------|---------------------------------|-------------------------------|-------------------------------|-------------------------------|-------------------------------|-------------------------------|-----------|
|                                     |                    | <120                            | 120-129                       | 130-139                       | 140-149                       | 150-159                       | ≥160                          |           |
| <b>Days From Hospital Discharge</b> | <b>Mortality</b>   | <b>60</b>                       | 2.19 (1.77-2.70)<br>p < 0.001 | 1.37 (1.10-1.71)<br>p < 0.001 | 1.02 (0.86-1.21)<br>p = 0.8   | 1.02 (0.85-1.23)<br>p = 0.8   | 1.07 (0.87-1.33)<br>p = 0.4   | Reference |
|                                     |                    | <b>90</b>                       | 2.16 (1.76-2.66)<br>p < 0.001 | 1.32 (1.06-1.64)<br>p = 0.001 | 0.96 (0.82-1.14)<br>p = 0.6   | 0.97 (0.81-1.16)<br>p = 0.7   | 1.04 (0.85-1.28)<br>p = 0.6   |           |
|                                     |                    | <b>120</b>                      | 2.13 (1.74-2.61)<br>p < 0.001 | 1.27 (1.03-1.57)<br>p = 0.003 | 0.91 (0.77-1.08)<br>p = 0.2   | 0.92 (0.77-1.11)<br>p = 0.3   | 1.02 (0.83-1.25)<br>p = 0.8   |           |
|                                     |                    | <b>180</b>                      | 2.08 (1.69-2.55)<br>p < 0.001 | 1.18 (0.95-1.47)<br>p = 0.048 | 0.81 (0.68-0.97)<br>p = 0.002 | 0.84 (0.69-1.02)<br>p = 0.019 | 0.96 (0.77-1.21)<br>p = 0.7   |           |
|                                     |                    | <b>270</b>                      | 2.00 (1.59-2.51)<br>p < 0.001 | 1.06 (0.82-1.36)<br>p = 0.6   | 0.69 (0.56-0.84)<br>p < 0.001 | 0.72 (0.57-0.92)<br>p = 0.001 | 0.89 (0.66-1.21)<br>p = 0.3   |           |
|                                     |                    | <b>365</b>                      | 1.92 (1.47-2.51)<br>p < 0.001 | 0.95 (0.69-1.29)<br>p = 0.6   | 0.58 (0.45-0.74)<br>p < 0.001 | 0.63 (0.46-0.85)<br>p < 0.001 | 0.82 (0.55-1.23)<br>p = 0.2   |           |
|                                     | <b>Readmission</b> | <b>60</b>                       | 1.32 (1.19-1.46)<br>p < 0.001 | 1.14 (1.02-1.27)<br>p = 0.002 | 1.08 (0.97-1.20)<br>p = 0.06  | 1.17 (1.04-1.32)<br>p < 0.001 | 1.16 (1.01-1.32)<br>p = 0.005 | Reference |
|                                     |                    | <b>90</b>                       | 1.23 (1.11-1.36)<br>p < 0.001 | 1.08 (0.98-1.20)<br>p = 0.051 | 1.02 (0.92-1.14)<br>p = 0.5   | 1.12 (1.00-1.26)<br>p = 0.008 | 1.11 (0.98-1.27)<br>p = 0.03  |           |
|                                     |                    | <b>120</b>                      | 1.15 (1.04-1.27)<br>p < 0.001 | 1.03 (0.93-1.14)<br>p = 0.5   | 0.97 (0.88-1.08)<br>p = 0.5   | 1.07 (0.96-1.20)<br>p = 0.1   | 1.07 (0.94-1.22)<br>p = 0.2   |           |
|                                     |                    | <b>180</b>                      | 1.00 (0.90-1.11)<br>p > 0.99  | 0.93 (0.83-1.04)<br>p = 0.09  | 0.87 (0.78-0.98)<br>p = 0.002 | 0.98 (0.87-1.11)<br>p = 0.7   | 0.98 (0.85-1.14)<br>p=0.8     |           |
|                                     |                    | <b>270</b>                      | 0.81 (0.71-0.93)<br>p < 0.001 | 0.80 (0.69-0.92)<br>p < 0.001 | 0.75 (0.65-0.86)<br>p < 0.001 | 0.86 (0.73-1.01)<br>p = 0.02  | 0.87 (0.71-1.06)<br>p = 0.08  |           |
|                                     |                    | <b>365</b>                      | 0.66 (0.56-0.79)<br>p < 0.001 | 0.68 (0.57-0.82)<br>p < 0.001 | 0.64 (0.54-0.76)<br>p < 0.001 | 0.76 (0.61-0.93)<br>p = 0.001 | 0.77 (0.59-1.01)<br>p = 0.013 |           |

Models were adjusted for age, comorbidities (chronic lung disease, congestive heart failure, dementia, malignancy, unexplained weight loss), laboratory values (hematocrit, blood urea nitrogen, bilirubin, albumin), and kidney-specific variables (AKI stage, community-acquired vs in-hospital AKI, proteinuria during hospital episode, baseline creatinine, discharge creatinine).

**eFigure 3.** Predicted Monthly Mortality Rates Over Time From Hospital Discharge for an “Average” Patient, With All Variables in the Model Except the Blood Pressure Category Set to Mean Values, for All Blood Pressure Categories in Those Who Did and Did Not Have an ACEI/ARB Prescribed Within 90 Days

**A. No ACEI/ARB Use**

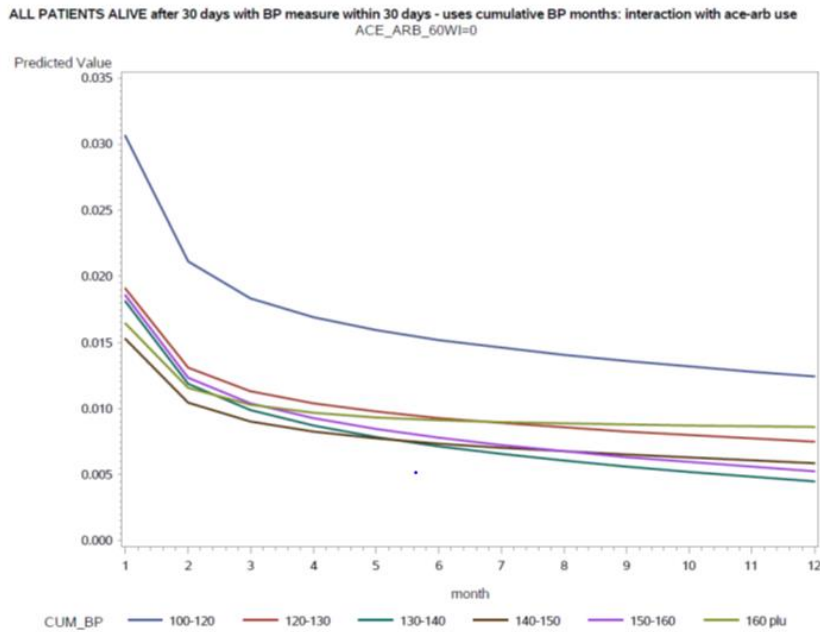

**B. ACEI/ARB Use**

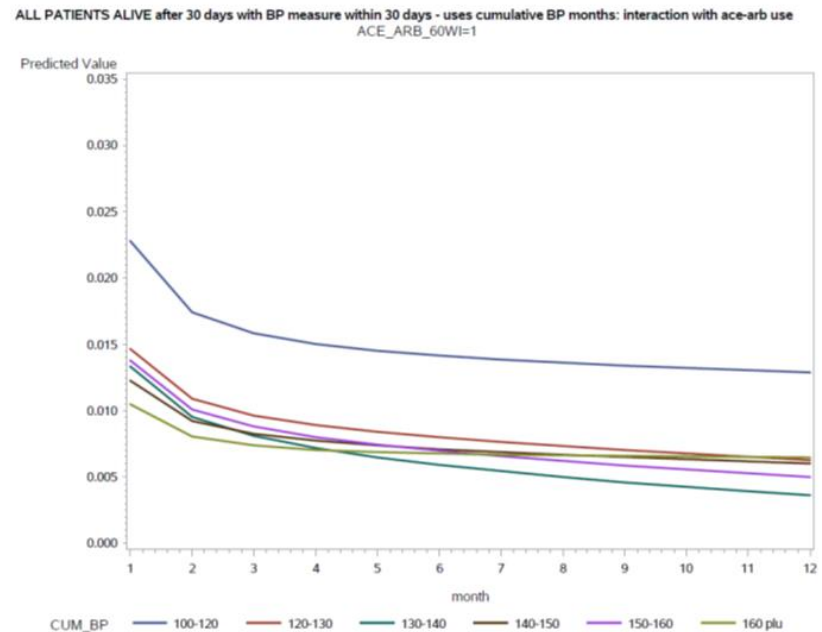

**eTable 3.** In Patients Without CHF at Baseline, Adjusted Hazard Ratios and 99% Confidence Intervals for Mortality and All-Cause Hospital Readmission Over Time, by Blood Pressure Category

|                              |             | Systolic Blood Pressure (mm Hg) |                               |                               |                               |                               | Reference                     |           |
|------------------------------|-------------|---------------------------------|-------------------------------|-------------------------------|-------------------------------|-------------------------------|-------------------------------|-----------|
|                              |             | <120                            | 120-129                       | 130-139                       | 140-149                       | 150-159                       |                               | ≥160      |
| Days From Hospital Discharge | Mortality   | 60                              | 2.02 (1.63-2.51)<br>p < 0.001 | 1.25 (1.00-1.57)<br>p = 0.01  | 1.11 (0.88-1.39)<br>p = 0.3   | 1.09 (0.85-1.41)<br>p = 0.4   | 1.19 (0.89-1.60)<br>p = 0.1   | Reference |
|                              |             | 90                              | 2.00 (1.62-2.46)<br>p < 0.001 | 1.21 (0.97-1.50)<br>p = 0.03  | 1.03 (0.83-1.28)<br>p = 0.7   | 1.07 (0.84-1.37)<br>p = 0.5   | 1.13 (0.85-1.49)<br>p = 0.3   |           |
|                              |             | 120                             | 1.97 (1.60-2.42)<br>p < 0.001 | 1.16 (0.94-1.44)<br>p = 0.07  | 0.96 (0.77-1.19)<br>p = 0.6   | 1.05 (0.83-1.34)<br>p = 0.6   | 1.07 (0.81-1.40)<br>p = 0.5   |           |
|                              |             | 180                             | 1.92 (1.55-2.36)<br>p < 0.001 | 1.08 (0.86-1.34)<br>p = 0.4   | 0.84 (0.67-1.05)<br>p = 0.04  | 1.02 (0.80-1.30)<br>p = 0.9   | 0.95 (0.71-1.28)<br>p = 0.7   |           |
|                              |             | 270                             | 1.84 (1.46-2.32)<br>p < 0.001 | 0.96 (0.74-1.24)<br>p = 0.7   | 0.68 (0.52-0.88)<br>p < 0.001 | 0.97 (0.72-1.30)<br>p = 0.8   | 0.81 (0.55-1.19)<br>p = 0.2   |           |
|                              |             | 365                             | 1.77 (1.34-2.32)<br>p < 0.001 | 0.86 (0.63-1.17)<br>p = 0.2   | 0.55 (0.40-0.76)<br>p < 0.001 | 0.92 (0.63-1.34)<br>p = 0.6   | 0.68 (0.41-1.14)<br>p = 0.054 |           |
|                              | Readmission | 60                              | 1.28 (1.15-1.42)<br>p < 0.001 | 1.14 (1.02-1.27)<br>p = 0.002 | 1.07 (0.96-1.20)<br>p = 0.09  | 1.10 (0.98-1.24)<br>p = 0.04  | 1.15 (1.00-1.31)<br>p = 0.009 | Reference |
|                              |             | 90                              | 1.21 (1.09-1.34)<br>p < 0.001 | 1.09 (0.98-1.21)<br>p = 0.04  | 1.02 (0.92-1.13)<br>p = 0.6   | 1.06 (0.95-1.19)<br>p = 0.2   | 1.11 (0.98-1.27)<br>p = 0.04  |           |
|                              |             | 120                             | 1.14 (1.03-1.27)<br>p = 0.001 | 1.04 (0.94-1.15)<br>p = 0.3   | 0.97 (0.87-1.08)<br>p = 0.5   | 1.03 (0.92-1.15)<br>p = 0.5   | 1.08 (0.95-1.23)<br>p = 0.1   |           |
|                              |             | 180                             | 1.03 (0.92-1.14)<br>p = 0.5   | 0.95 (0.85-1.06)<br>p = 0.2   | 0.88 (0.78-0.98)<br>p = 0.002 | 0.96 (0.85-1.09)<br>p = 0.4   | 1.01 (0.88-1.17)<br>p = 0.8   |           |
|                              |             | 270                             | 0.87 (0.77-0.99)<br>p = 0.007 | 0.83 (0.72-0.95)<br>p < 0.001 | 0.75 (0.66-0.86)<br>p < 0.001 | 0.87 (0.75-1.02)<br>p = 0.02  | 0.92 (0.76-1.12)<br>p = 0.3   |           |
|                              |             | 365                             | 0.74 (0.63-0.87)<br>p < 0.001 | 0.72 (0.61-0.85)<br>p < 0.001 | 0.65 (0.55-0.76)<br>p < 0.001 | 0.79 (0.64-0.96)<br>p = 0.002 | 0.84 (0.65-1.08)<br>p = 0.08  |           |

\* P-value < 0.05

Models were adjusted for age, comorbidities (chronic lung disease, congestive heart failure, dementia, malignancy, unexplained weight loss), laboratory values (hematocrit, blood urea nitrogen, bilirubin, albumin), and kidney-specific variables (AKI stage, community-acquired vs in-hospital AKI, proteinuria, baseline creatinine, discharge creatinine)

**eTable 4.** AKI Stage Stratification: Hazard Ratios and 95% Confidence Intervals for Mortality and Readmission Over Time, by Blood Pressure Category

A. Stage 1 AKI

|                              |             | Systolic Blood Pressure (mm Hg) |                               |                               |                               |                               |                               |           |
|------------------------------|-------------|---------------------------------|-------------------------------|-------------------------------|-------------------------------|-------------------------------|-------------------------------|-----------|
|                              |             | <120                            | 120-129                       | 130-139                       | 140-149                       | 150-159                       |                               | ≥160      |
| Days From Hospital Discharge | Mortality   | 60                              | 2.21 (1.81-2.71)<br>p < 0.001 | 1.38 (1.11-1.70)<br>p < 0.001 | 1.21 (0.98-1.50)<br>p = 0.02  | 1.14 (0.90-1.45)<br>p = 0.1   | 1.22 (0.92-1.61)<br>p = 0.07  | Reference |
|                              |             | 90                              | 2.17 (1.78-2.64)<br>p < 0.001 | 1.33 (1.08-1.63)<br>p < 0.001 | 1.13 (0.92-1.40)<br>p = 0.1   | 1.11 (0.88-1.40)<br>p = 0.2   | 1.15 (0.89-1.50)<br>p = 0.2   |           |
|                              |             | 120                             | 2.13 (1.75-2.59)<br>p < 0.001 | 1.28 (1.04-1.56)<br>p = 0.002 | 1.06 (0.86-1.30)<br>p = 0.5   | 1.08 (0.86-1.35)<br>p = 0.4   | 1.09 (0.84-1.42)<br>p = 0.4   |           |
|                              |             | 180                             | 2.05 (1.68-2.50)<br>p < 0.001 | 1.19 (0.96-1.46)<br>p = 0.04  | 0.92 (0.74-1.14)<br>p = 0.3   | 1.02 (0.80-1.29)<br>p = 0.9   | 0.98 (0.74-1.30)<br>p = 0.9   |           |
|                              |             | 270                             | 1.94 (1.56-2.40)<br>p < 0.001 | 1.06 (0.84-1.34)<br>p = 0.5   | 0.74 (0.58-0.95)<br>p = 0.002 | 0.93 (0.70-1.24)<br>p = 0.5   | 0.84 (0.58-1.20)<br>p = 0.2   |           |
|                              |             | 365                             | 1.83 (1.43-2.33)<br>p < 0.001 | 0.95 (0.71-1.26)<br>p = 0.6   | 0.60 (0.45-0.82)<br>p < 0.001 | 0.85 (0.59-1.22)<br>p = 0.2   | 0.71 (0.44-1.15)<br>p = 0.07  |           |
|                              | Readmission | 60                              | 1.33 (1.20-1.47)<br>p < 0.001 | 1.20 (1.08-1.33)<br>p < 0.001 | 1.13 (1.01-1.25)<br>p = 0.004 | 1.17 (1.05-1.32)<br>p < 0.001 | 1.19 (1.04-1.36)<br>p = 0.001 | Reference |
|                              |             | 90                              | 1.25 (1.13-1.39)<br>p < 0.001 | 1.14 (1.03-1.26)<br>p = 0.001 | 1.07 (0.96-1.19)<br>p = 0.09  | 1.12 (1.01-1.26)<br>p = 0.007 | 1.15 (1.01-1.30)<br>p = 0.005 |           |
|                              |             | 120                             | 1.18 (1.07-1.31)<br>p < 0.001 | 1.08 (0.98-1.20)<br>p = 0.04  | 1.02 (0.92-1.13)<br>p = 0.7   | 1.08 (0.96-1.20)<br>p = 0.09  | 1.11 (0.97-1.26)<br>p = 0.04  |           |
|                              |             | 180                             | 1.05 (0.95-1.17)<br>p = 0.2   | 0.98 (0.88-1.09)<br>p = 0.7   | 0.92 (0.83-1.03)<br>p = 0.047 | 0.99 (0.88-1.12)<br>p = 0.8   | 1.03 (0.89-1.18)<br>p = 0.6   |           |
|                              |             | 270                             | 0.89 (0.78-1.00)<br>p = 0.01  | 0.85 (0.74-0.96)<br>p = 0.001 | 0.79 (0.69-0.90)<br>p < 0.001 | 0.87 (0.75-1.01)<br>p = 0.02  | 0.92 (0.76-1.11)<br>p = 0.2   |           |
|                              |             | 365                             | 0.75 (0.64-0.87)<br>p < 0.001 | 0.73 (0.62-0.86)<br>p < 0.001 | 0.68 (0.58-0.80)<br>p < 0.001 | 0.77 (0.63-0.93)<br>p = 0.001 | 0.82 (0.64-1.06)<br>p = 0.046 |           |

B. Stage 2+3 AKI

|                              |             | Systolic Blood Pressure (mm Hg) |                               |                               |                               |                               |                              |           |
|------------------------------|-------------|---------------------------------|-------------------------------|-------------------------------|-------------------------------|-------------------------------|------------------------------|-----------|
|                              |             | <120                            | 120-129                       | 130-139                       | 140-149                       | 150-159                       |                              | ≥160      |
| Days From Hospital Discharge | Mortality   | 60                              | 2.20 (1.57-3.07)<br>p < 0.001 | 1.33 (0.94-1.88)<br>p = 0.04  | 1.16 (0.81-1.66)<br>p = 0.3   | 1.00 (0.67-1.49)<br>p = 0.9   | 1.31 (0.83-2.05)<br>p = 0.13 | Reference |
|                              |             | 90                              | 2.15 (1.55-2.98)<br>p < 0.001 | 1.30 (0.92-1.82)<br>p = 0.047 | 1.07 (0.76-1.52)<br>p = 0.6   | 0.99 (0.67-1.46)<br>p = 0.9   | 1.22 (0.79-1.88)<br>p = 0.2  |           |
|                              |             | 120                             | 2.11 (1.53-2.91)<br>p < 0.001 | 1.27 (0.91-1.77)<br>p = 0.07  | 0.99 (0.70-1.40)<br>p = 0.9   | 0.99 (0.68-1.44)<br>p = 0.9   | 1.14 (0.74-1.76)<br>p = 0.4  |           |
|                              |             | 180                             | 2.03 (1.46-2.81)<br>p < 0.001 | 1.21 (0.86-1.71)<br>p = 0.2   | 0.84 (0.59-1.21)<br>p = 0.2   | 0.98 (0.65-1.45)<br>p = 0.9   | 1.00 (0.62-1.62)<br>p > 0.99 |           |
|                              |             | 270                             | 1.91 (1.33-2.75)<br>p < 0.001 | 1.13 (0.75-1.69)<br>p = 0.4   | 0.66 (0.43-1.03)<br>p = 0.02  | 0.96 (0.58-1.59)<br>p = 0.8   | 0.82 (0.43-1.57)<br>p = 0.4  |           |
|                              |             | 365                             | 1.80 (1.17-2.77)<br>p < 0.001 | 1.05 (0.64-1.73)<br>p = 0.8   | 0.52 (0.30-0.91)<br>p = 0.002 | 0.94 (0.49-1.82)<br>p = 0.8   | 0.67 (0.28-1.59)<br>p = 0.2  |           |
|                              | Readmission | 60                              | 1.15 (0.96-1.36)<br>p = 0.04  | 0.99 (0.83-1.18)<br>p = 0.9   | 0.93 (0.78-1.11)<br>p = 0.3   | 1.02 (0.84-1.23)<br>p = 0.8   | 1.00 (0.80-1.24)<br>p = 0.9  | Reference |
|                              |             | 90                              | 1.07 (0.90-1.26)<br>p = 0.3   | 0.94 (0.79-1.11)<br>p = 0.3   | 0.87 (0.73-1.03)<br>p = 0.03  | 0.96 (0.80-1.16)<br>p = 0.6   | 0.96 (0.78-1.19)<br>p = 0.7  |           |
|                              |             | 120                             | 0.99 (0.84-1.17)<br>p = 0.9   | 0.89 (0.75-1.05)<br>p = 0.07  | 0.81 (0.68-0.96)<br>p = 0.001 | 0.91 (0.75-1.09)<br>p = 0.2   | 0.93 (0.75-1.16)<br>p = 0.4  |           |
|                              |             | 180                             | 0.86 (0.72-1.03)<br>p = 0.03  | 0.79 (0.66-0.95)<br>p = 0.001 | 0.70 (0.59-0.85)<br>p < 0.001 | 0.81 (0.66-1.00)<br>p = 0.009 | 0.87 (0.68-1.12)<br>p = 0.2  |           |
|                              |             | 270                             | 0.69 (0.55-0.87)<br>p < 0.001 | 0.67 (0.53-0.85)<br>p < 0.001 | 0.57 (0.46-0.72)<br>p < 0.001 | 0.68 (0.52-0.90)<br>p < 0.001 | 0.79 (0.56-1.12)<br>p = 0.08 |           |
|                              |             | 365                             | 0.56 (0.42-0.75)<br>p < 0.001 | 0.57 (0.42-0.77)<br>p < 0.001 | 0.47 (0.35-0.63)<br>p < 0.001 | 0.58 (0.40-0.83)<br>p < 0.001 | 0.72 (0.45-1.14)<br>p = 0.06 |           |

Models were adjusted for age, comorbidities (chronic lung disease, congestive heart failure, dementia, malignancy, unexplained weight loss), laboratory values (hematocrit, blood urea nitrogen, bilirubin, albumin), and kidney-specific variables (AKI stage, community-acquired vs in-hospital AKI, proteinuria, baseline creatinine, discharge creatinine).
